# Supplementary material
Source: PubMed Central journal article supplement (PMC5425102)
Supplement: NIHMS855681-supplement-Supplementary_Materials.pdf [file NIHMS855681-supplement-Supplementary_Materials.pdf]

1  
2  
3  
4  
5  
6  
7  
8  
9  
10  
11  
12  
13  
14  
15  
16

**Supplemental material for**

**D-Amino Acids Inhibit Initial Bacterial Adhesion: Thermodynamic Evidence**

Su-Fang Xing<sup>a</sup>, Xue-Fei Sun<sup>a</sup>, Alicia A. Taylor<sup>b</sup>, Sharon L. Walker<sup>b</sup>, Yi-Fu Wang<sup>a</sup>,  
Shu-Guang Wang<sup>a</sup>

Shandong Key Laboratory of Water Pollution Control and Resource Reuse, School of  
Environmental Science and Engineering, Shandong University, Jinan 250100, China<sup>a</sup>  
Department of Chemical and Environmental Engineering, University of California,  
Riverside, Riverside, California 92521, United States<sup>b</sup>

Corresponding author: Xue-Fei Sun, Fax: +86 531 88364513; E-mail:  
[xuefeisun@sdu.edu.cn](mailto:xuefeisun@sdu.edu.cn); Shu-Guang Wang, Fax: +86 531 88364513; E-mail:  
[wsg@sdu.edu.cn](mailto:wsg@sdu.edu.cn)

17 **Part 1: Methods and Materials**

18 **Bacterial size.** The size of bacteria was calculated using a scanning electron  
19 microscope (SEM, HITACHI S-570, Japan). The cells were fixed with 3.0%  
20 glutaraldehyde in 0.1 M phosphate buffer (pH 7.2), dehydrated with ethanol,  
21 silver-coated by a sputter, and observed in the SEM.

22 **Bacterial preparation of Zeta potential.** Zeta potential ( $\zeta$  potential) of the  
23 bacteria (ZetaSizer 3000HSA (Malvern, England)) was determined using freshly  
24 harvested cells from the LB media with different concentrations of D-tyrosine (0, 10,  
25 25, 50  $\mu$ M) and resuspended in 10 mM KCl (the pH of the solution was unadjusted  
26 (5.6-5.8) at an optical density of 0.2-0.25 measured at 600 nm with a  
27 spectrophotometer.

28 **Cells Adhesion and Desorption Tests**

29 Cells adhesion tests were conducted as previously reported (Kim et al. 2009). The  
30 attachment efficiency ( $A$ , %) was calculated as:

31 
$$A(\%) = \frac{C_0 - C_e}{C_0} \quad (S1)$$

32 where  $C_0$ ,  $C_e$  are the initial and final optical density, respectively.

33 Next the desorption rate ( $R$ , %) ( $OD_{600}$  of reversibly adhered bacteria divided by  
34 the value of  $OD_{600}$  for all the adhered bacteria) was calculated for each test by  
35 experimentally determined  $C_0'$  ( $OD_{600}$  before desorption tests in 0.1 mM KCl solution)  
36 and  $C_e'$  ( $OD_{600}$  after desorption tests in 0.1 mM KCl solution) as follows (Kuznar and  
37 Elimelech 2007):

38 
$$R = \frac{C_e' - C_0'}{C_0 - C_e} \times 100\% \quad (S2)$$

39        If adhesion of the cells was completely irreversible then  $R = 0\%$ , whereas if  $R =$   
40         $100\%$  adhesion was completely reversible. All the experiments were conducted for at  
41        least three times.

42

43 **Part 2: Equations and parameters of surface thermodynamics**

44 The surface tension component and parameters of bacterial surface were calculated  
45 with eq. S3:

46 
$$(1 + \cos \theta) \gamma_L = 2((\gamma_B^{LW} \gamma_L^{LW})^{1/2} + (\gamma_B^+ \gamma_L^-)^{1/2} + (\gamma_B^- \gamma_L^+)^{1/2})$$
 (S3)

47 where  $\theta$  is the contact angle between the bacteria surface and the drop liquid and  $L$   
48 represents the liquid used in the experiment.  $\gamma^+$  and  $\gamma^-$  are the electron-acceptor and  
49 electron-donor parameters, respectively. The  $\gamma^+$ ,  $\gamma^-$  and  $\gamma^{LW}$  of bacteria could be  
50 determined by eq. S3.

51 The parameters for eq. 4 - 6 (shown in the manuscript) are listed here:

52 
$$\Delta G^{LW} = 2(\sqrt{\gamma_L^{LW}} - \sqrt{\gamma_G^{LW}})(\sqrt{\gamma_B^{LW}} - \sqrt{\gamma_L^{LW}})$$
 (S4)

53 
$$\Delta G^{AB} = 2\sqrt{\gamma_L^+}(\sqrt{\gamma_G^-} + \sqrt{\gamma_B^-} - \sqrt{\gamma_L^-}) + 2\sqrt{\gamma_L^-}(\sqrt{\gamma_G^+} + \sqrt{\gamma_B^+} - \sqrt{\gamma_L^+}) - 2(\sqrt{\gamma_G^+ \gamma_B^-} + \sqrt{\gamma_G^- \gamma_B^+})$$
 (S5)

54

**Part 3: Results****TABLE S1** Total interaction energy profiles as a function of separation distance between *E. coli* JM109 cells and quartz sand

| <b>Parameters</b>                     | <b>0 <math>\mu\text{M}</math></b> | <b>10 <math>\mu\text{M}</math></b> | <b>25 <math>\mu\text{M}</math></b> | <b>50 <math>\mu\text{M}</math></b> |
|---------------------------------------|-----------------------------------|------------------------------------|------------------------------------|------------------------------------|
| Secondary Energy Minima Depth (kT)    | (-) <sup>a</sup>                  | -114.5                             | -54.7                              | -54.1                              |
| Secondary Energy Minima Distance (nm) | (-) <sup>a</sup>                  | 1.7                                | 2.9                                | 3.1                                |
| Closest Approach Distance (nm)        | (-) <sup>a</sup>                  | 0.6                                | 2.0                                | 2.2                                |
| Hamaker Constant (J)                  | $3.3 \times 10^{-21}$             | $3.2 \times 10^{-21}$              | $3.1 \times 10^{-21}$              | $2.9 \times 10^{-21}$              |

56 (-)<sup>a</sup> indicate the values that do not exist.

57

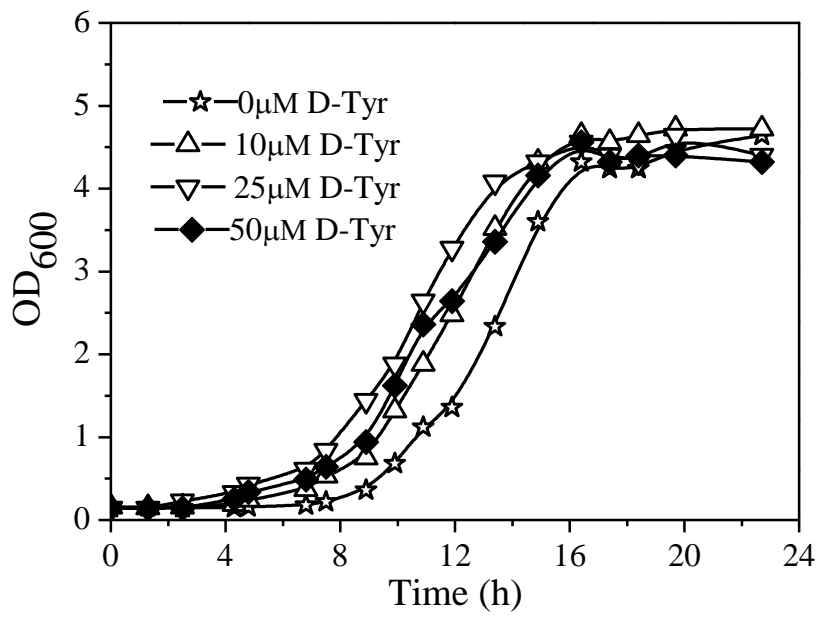

58

59 **Figure S1.** Growth curves of *E. coli* cells from LB media with different D-Tyrosine  
60 concentrations (0, 10, 25, 50 μM).

61

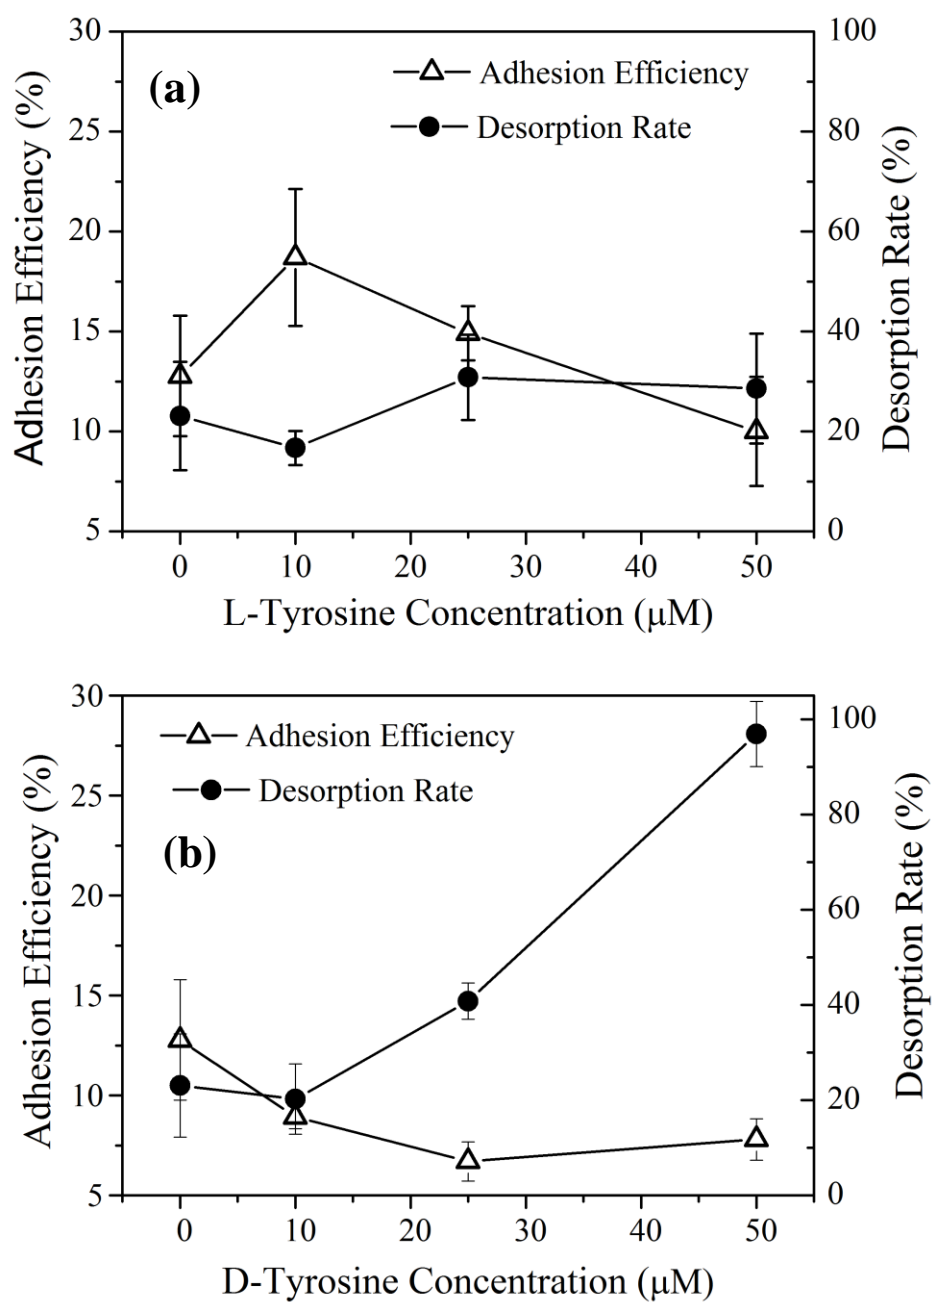

62

63 **Figure S2.** Adhesion and desorption efficiencies of *E. coli* onto and off of a quartz

64 collector surface, determined as a function of D-Tyrosine (a), and L-Tyrosine (b).

65 Experiments were conducted at unadjusted pH (5.6-5.8), and at room temperature

66 (25°C); bacteria were cultivated from the bacterial minimal media. Error bars indicate

67 one standard deviation.

68

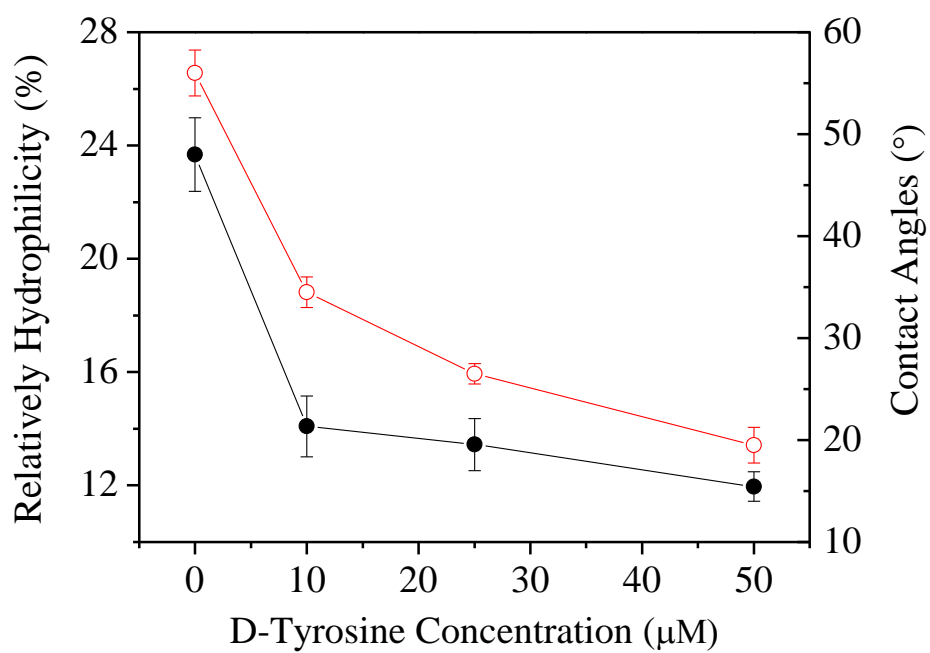

69

70 **Figure S3.** The relative hydrophobicity and contact angles of *E. coli* cells as a function

71 of D-Tyrosine concentration.

72



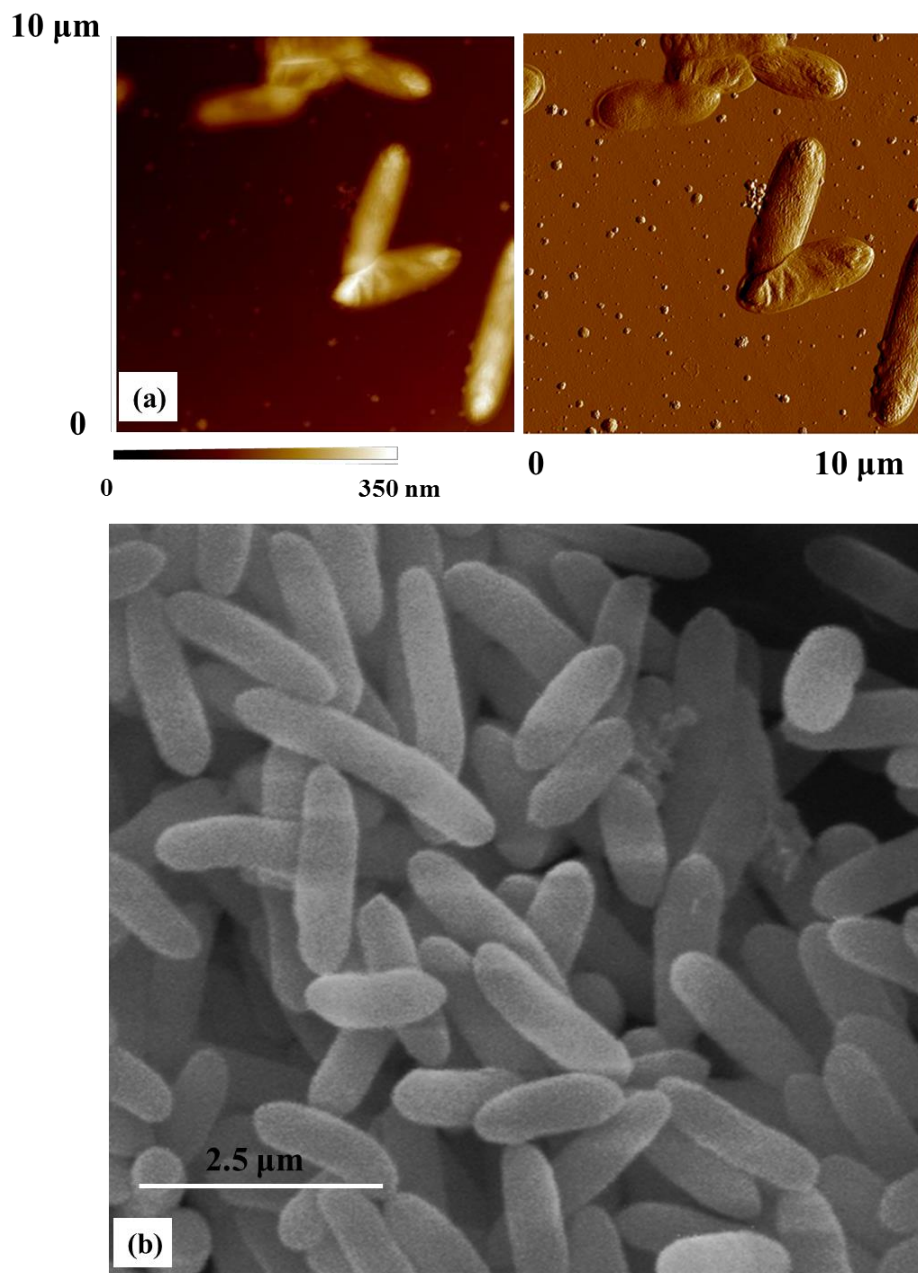

73

74 **Figure S4.** AFM topographical (left) and deflective (right) images are shown for (a) *E.*

75 *coli* JM109 cells and (b) SEM images of *E. coli* JM109 cells.

76

77 **References**

78 Kim HN, Hong Y, Lee I, Bradford SA, Walker SL. 2009. Surface characteristics and  
79 adhesion behavior of *Escherichia coli* O157:H7: Role of extracellular  
80 macromolecules. *Biomacromolecules* 10: 2556-2564.

81

82
